# Supplementary material for: Loss of AXIN1 drives acquired resistance to WNT pathway blockade in colorectal cancer cells carrying RSPO3 fusions
Source: PubMed Central journal article supplement (PMC5331210; doi:10.15252/emmm.201606773), 2017-01-18
Supplement: EMMM-9-293-s001.pdf [file EMMM-9-293-s001.pdf]

# Loss of Axin1 drives acquired resistance to WNT pathway blockade in colorectal cancers cells carrying RSPO3 fusions.

Gabriele Picco<sup>1,2</sup>, Consalvo Petti<sup>1,2</sup>, Alessia Centonze<sup>2</sup>, Erica Torchiario<sup>1</sup>, Giovanni Crisafulli<sup>1</sup>, Luca Novara<sup>1</sup>, Andrea Acquaviva<sup>3</sup>, Alberto Bardelli<sup>1,2</sup> and Enzo Medico<sup>\*1,2</sup>

## APPENDIX

### Table of contents

**Appendix Figure S1.** Stromal scores vs. RSPO3 expression in the TCGA dataset.

**Appendix Figure S2.** RSPO3 expression vs. stromal scores in a 2140-sample CRC microarray dataset.

**Appendix Figure S3.** Absence of RSPO3 rearrangements in 12 additional TCGA CRC samples.

**Appendix Figure S4.** Validation by Sanger sequencing of RSPO3 fusion transcripts in CRC cell lines.

**Appendix Figure S5.** Axin1 mutations detected in VACO6<sub>R</sub>.

**Appendix Figure S6.** Single clone analysis of VACO6R cells.

**Appendix Figure S7.** VACO6<sub>R</sub> cells are specifically resistant to WNT pathway inhibitors.

**Appendix Table S1A.** RSPO2/3 fusion analysis in TCGA CRC samples.

**Appendix Table S1B.** Settings of Defuse, Chimerascan and Mapsplice tools.

**Appendix Table S2A.** Point mutations detected by exome sequencing of VACO6<sub>R</sub> cells.

**Appendix Table S2B.** Insertions / Deletions detected by exome sequencing of VACO6<sub>R</sub>.

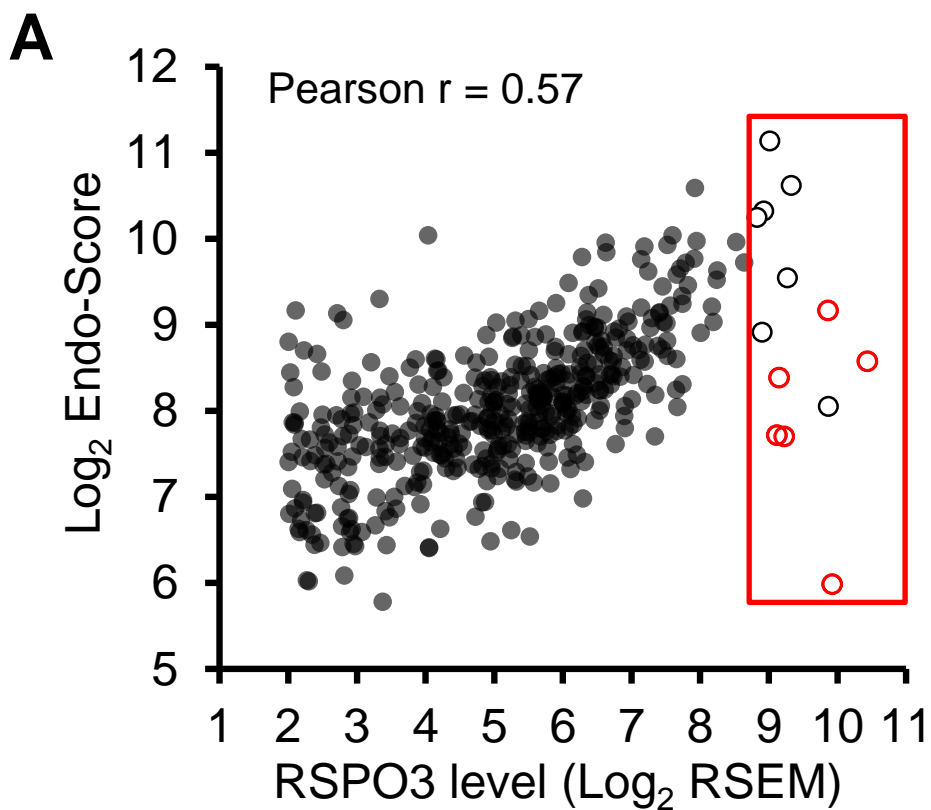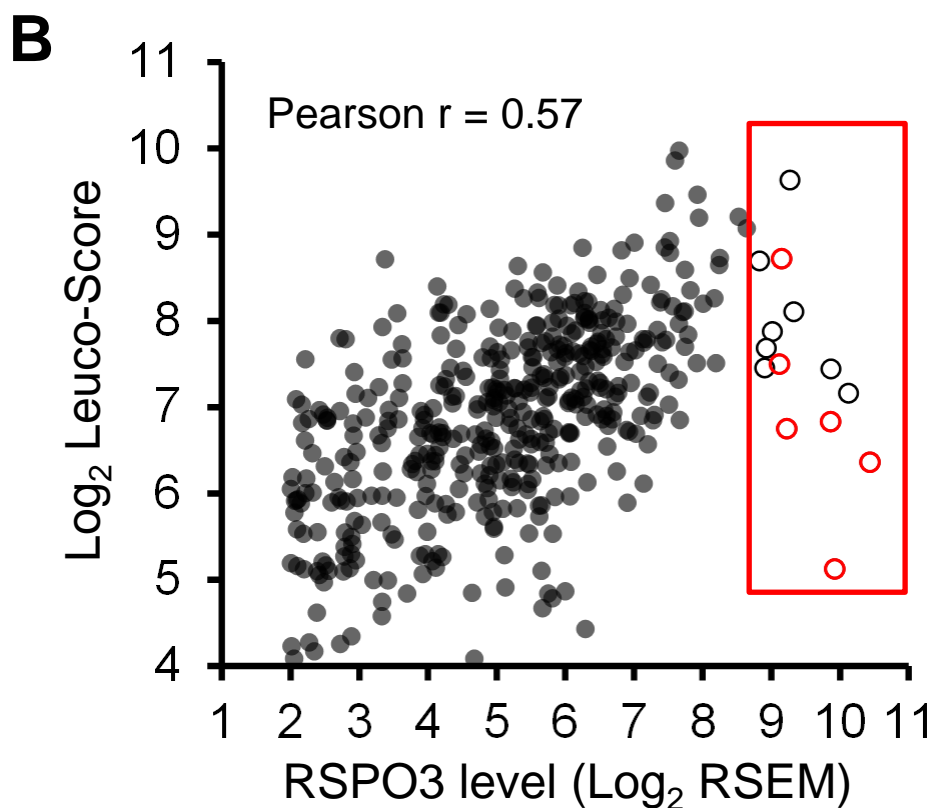

**Picco et al., Appendix Figure S1. Stromal scores vs. RSPO3 expression in the TCGA dataset.** Scatter plots displaying the correlation between RSPO3 expression levels (x-axis) and Endo-score (A) or Leuco-score (B). The red boxes highlight samples with high RSPO3 expression and variable Endo- or Leuco-score. Empty dots indicate samples selected for fusion analysis. Empty dots with red border indicate samples with high RSPO3 levels and medium-low CAF-score, also highlighted in Figure 1A.

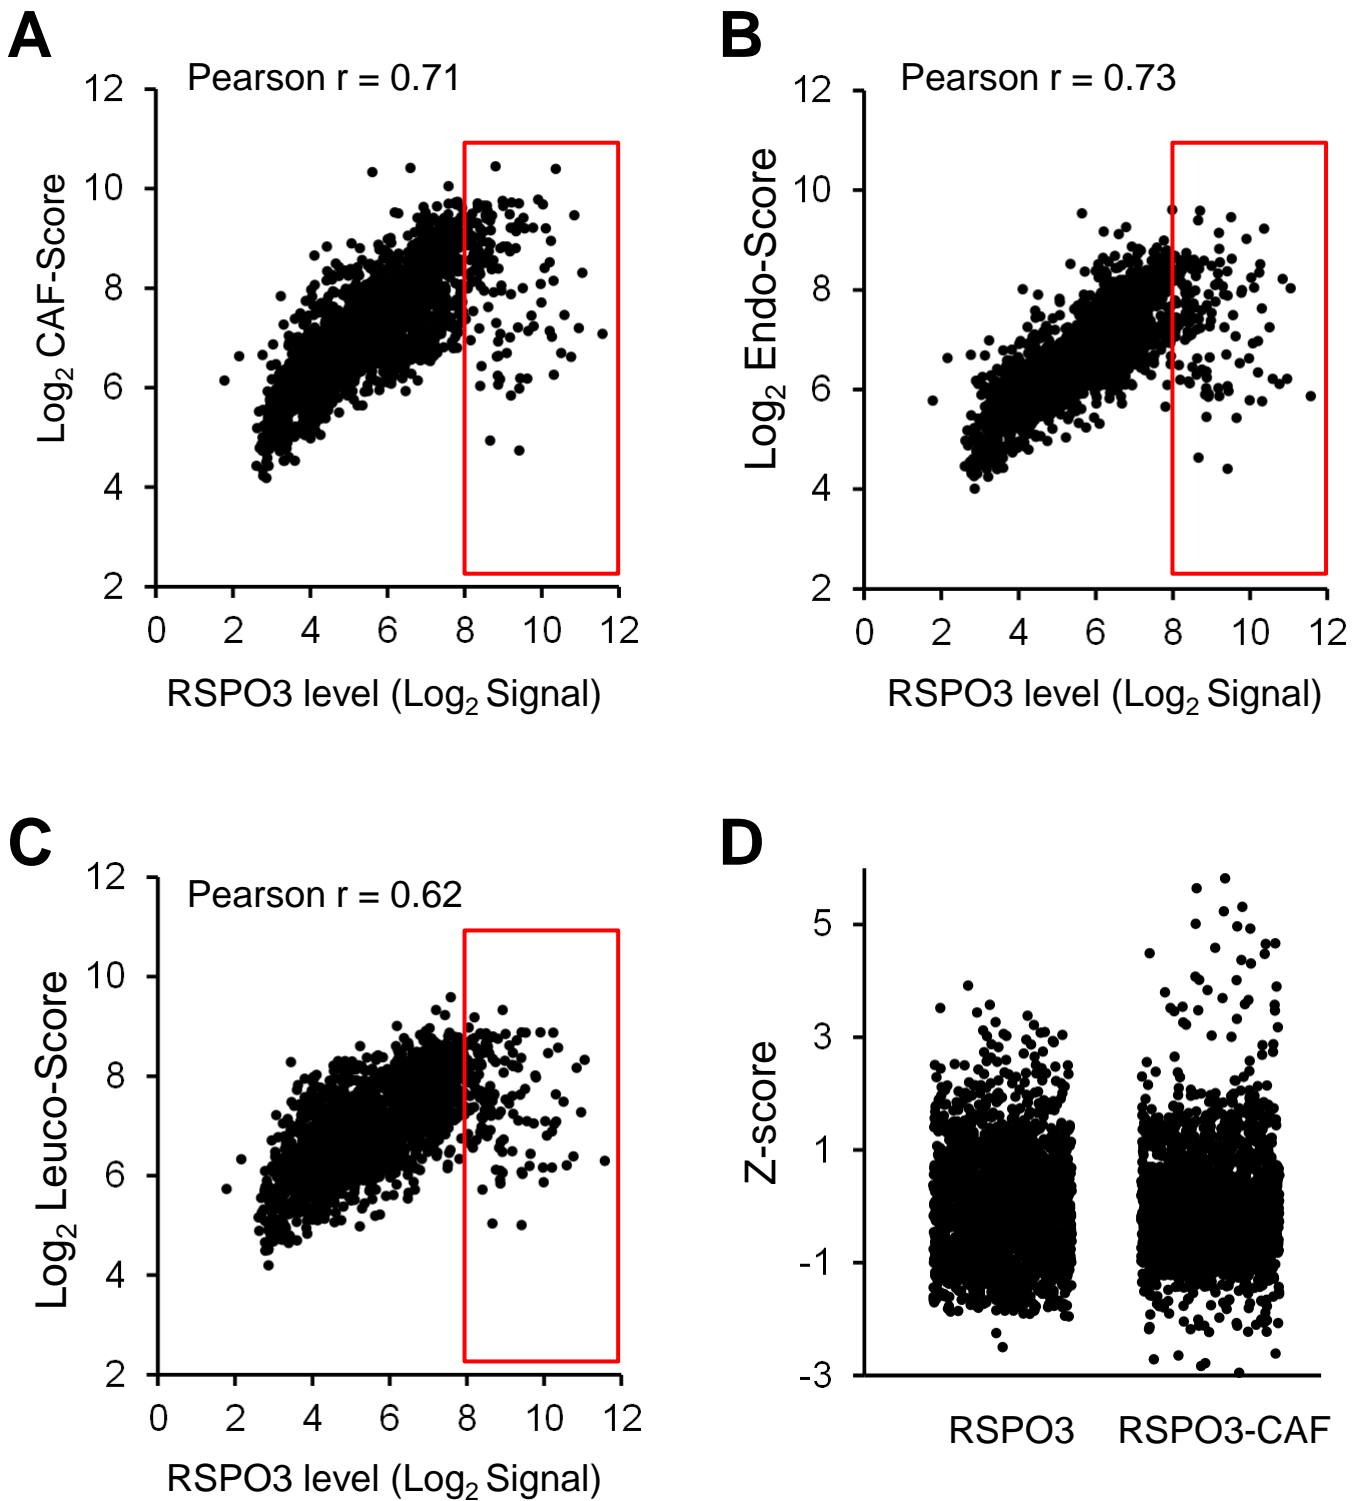

**Picco et al., Appendix Figure S2. RSPO3 expression vs. stromal scores in a 2140-sample CRC microarray dataset.** A composite CRC gene expression dataset was built from the following public datasets: GSE13294, GSE14333, GSE17536, GSE20916, GSE2109, GSE35896, GSE37892, GSE39582, KFSYSCC. Scatter plots display the correlation between RSPO3 expression levels on the x-axis and CAF-score (A), Endo-score (B) and Leuco-score (C), on the y-axis. The red boxes highlight samples with high RSPO3 expression and variable stromal scores. (D) Dot plots displaying the distribution of Z-Score values for RSPO3 alone and RSPO3 minus CAF-score.

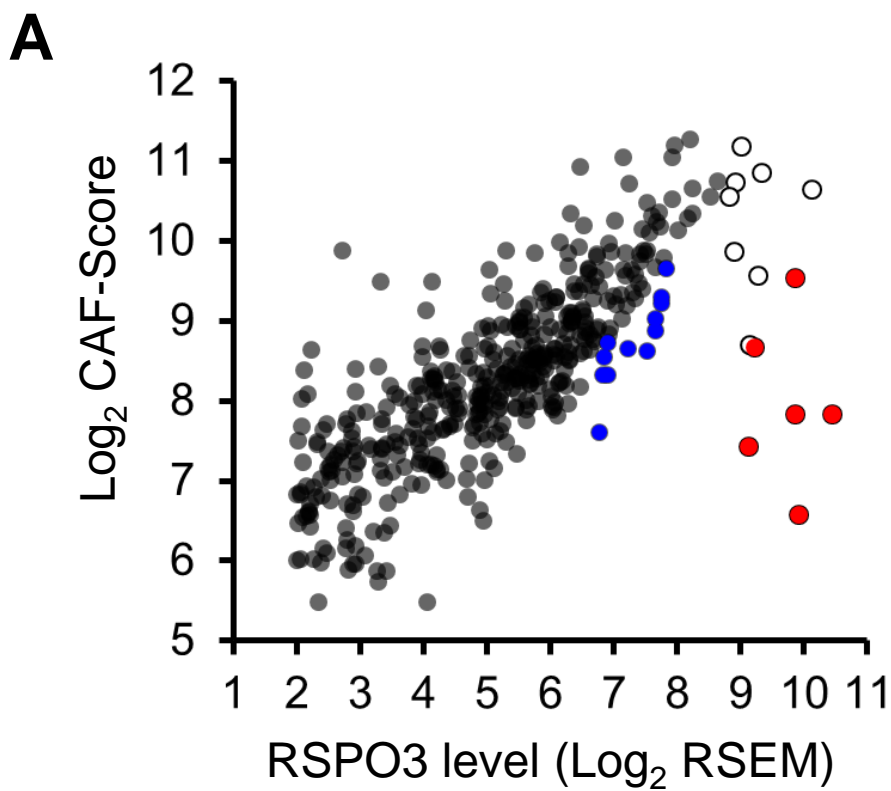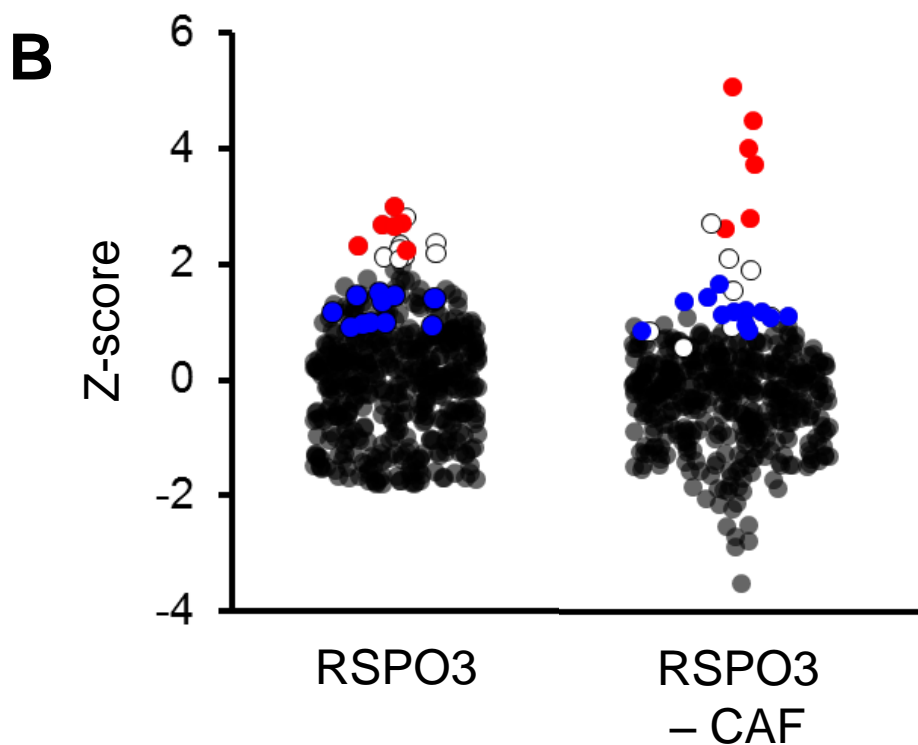

**Picco et al., Appendix Figure S3. Absence of RSPO3 rearrangements in 12 additional TCGA CRC samples.** (A) Scatter plot displaying the correlation between RSPO3 expression (x-axis) and CAF-score (y-axis). (B) Dot plots displaying the distribution of Z-Score values for RSPO3 alone (left panel) and RSPO3 minus CAF-score (right panel) in the 450-sample TCGA dataset. Blue dots indicate 12 samples with intermediate RSPO3 expression and low CAF-score, selected to complete the search for RSPO3 fusions. Empty dots indicate previously analyzed samples that do not carry RSPO3 fusions. Red dots indicate RSPO3 fused samples.

## VACO6

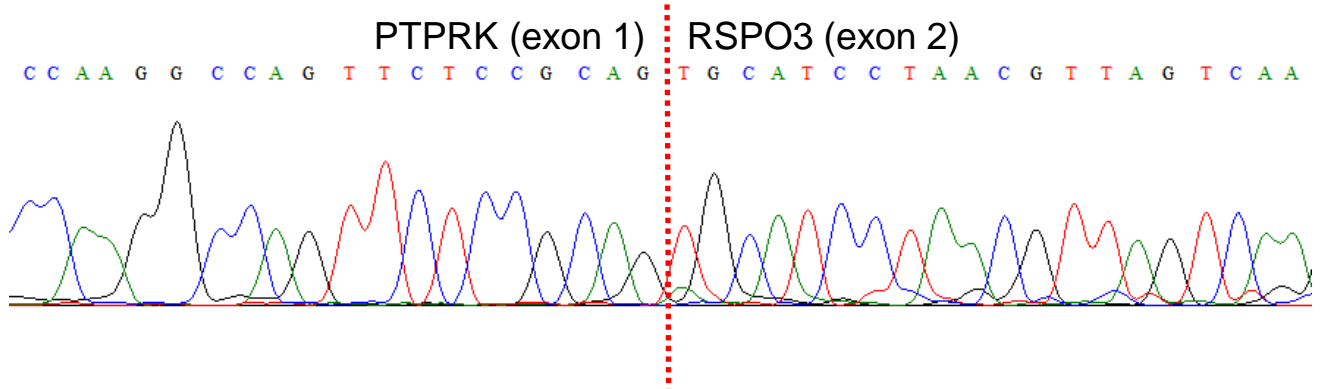

## SNU1411

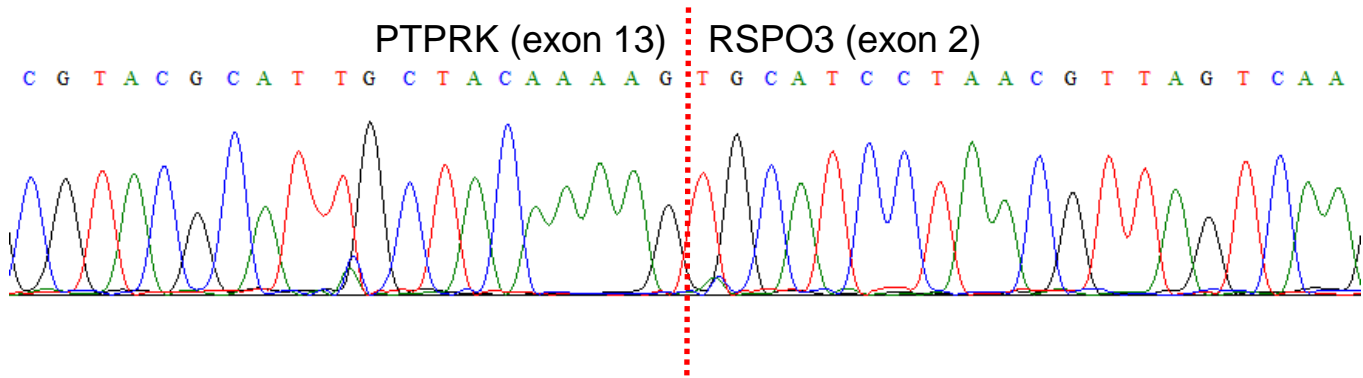

**Picco et al., Appendix Figure S4: validation by Sanger sequencing of RSPO3 fusion transcripts in CRC cell lines.** Representative Sanger sequencing chromatograms of RT-PCR amplicons confirming the PTPRK(e1)-RSPO3(e2) and the novel PTPRK(e13)-RSPO3(e2) fusion junctions in VACO6 and SNU1411 cells, respectively.

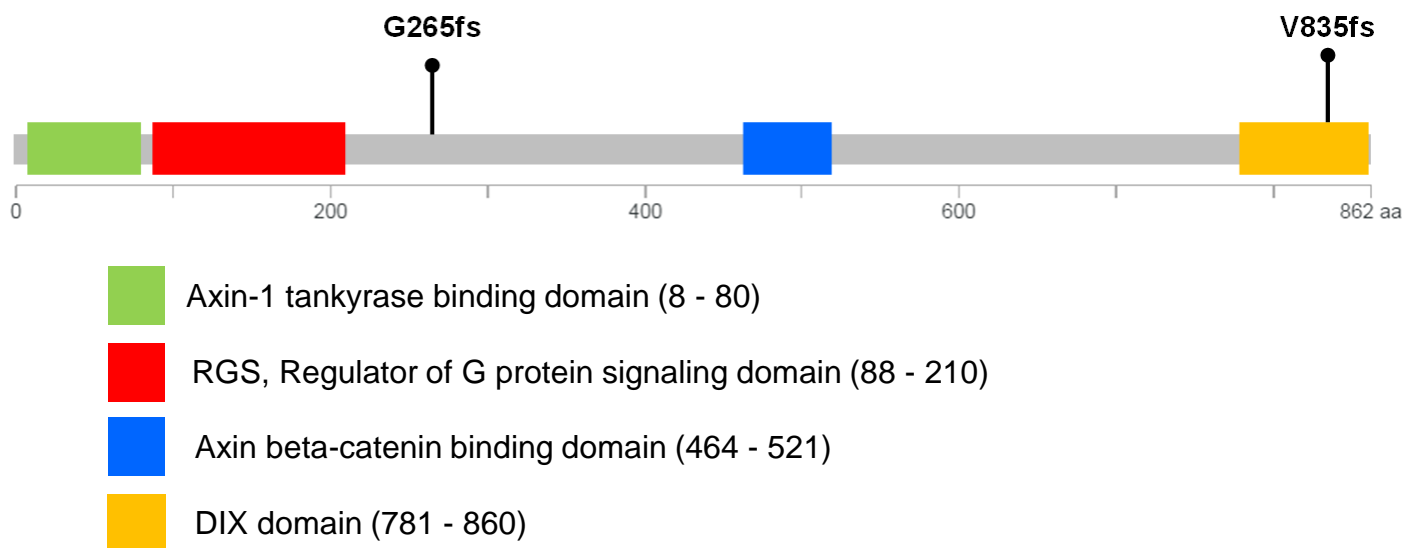

**Picco et al., Appendix Figure S5. Axin1 mutations detected in VACO6<sub>R</sub>.** Representation of the two frameshift-inducing single nucleotide deletions in the AXIN1 gene in VACO6<sub>R</sub> cells, as reported for human tumor samples by cBioPortal ([www.cbioportal.org](http://www.cbioportal.org); Cerami et al., *Cancer Discov.* 2012). Color-coded rectangles highlight AXIN1 protein domains.

**A**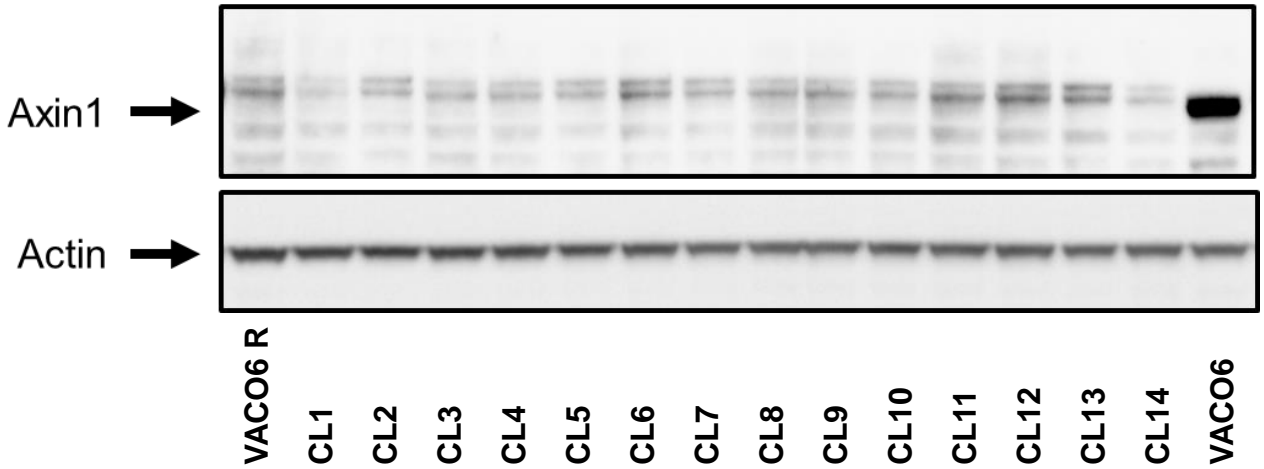**B**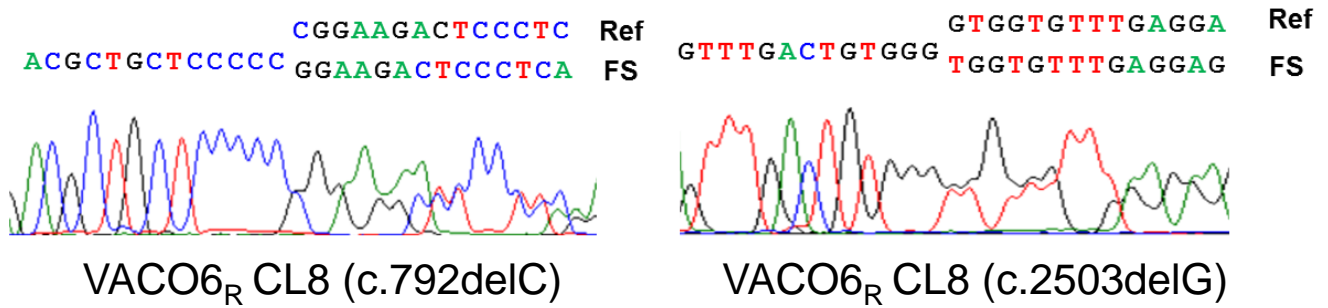

**Picco et al., Appendix Figure S6. Single clone analysis of VACO6<sub>R</sub> cells.**

(A) Western blot showing loss of the Axin1 protein in all 14 single cell clones derived from VACO6<sub>R</sub> population. (B) Representative chromatograms of Sanger-sequenced PCR products showing the two c.792delC and c.2503delG AXIN1 frameshift deletions in a representative clone (CL8) derived from VACO6<sub>R</sub> cells.

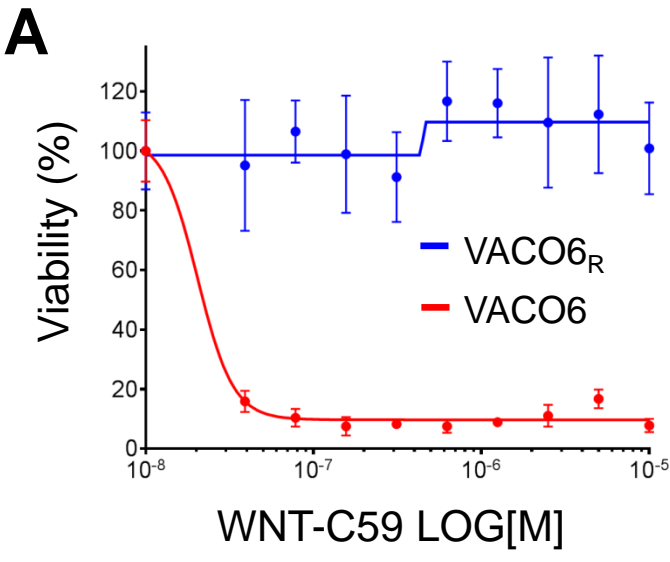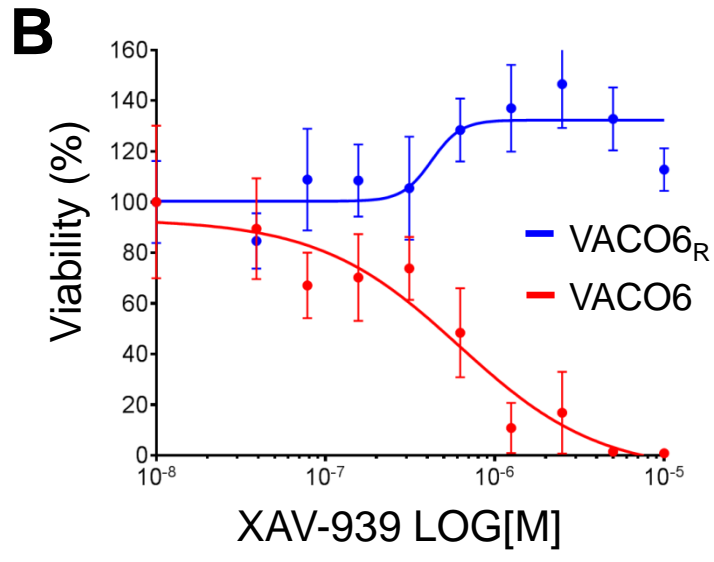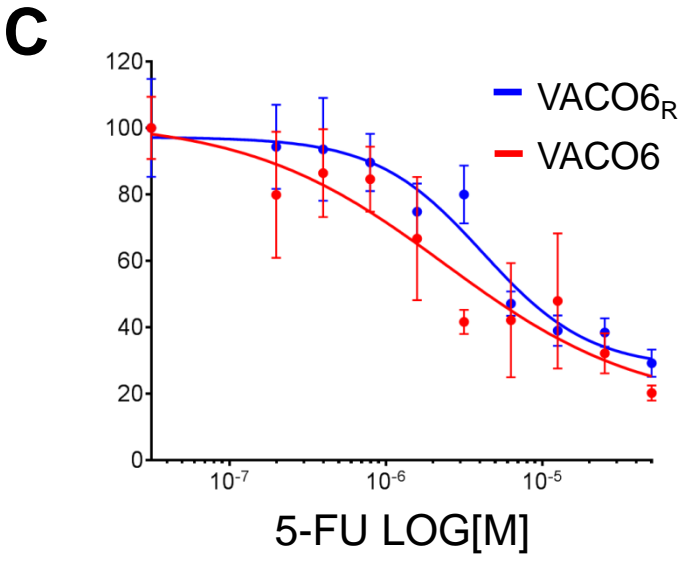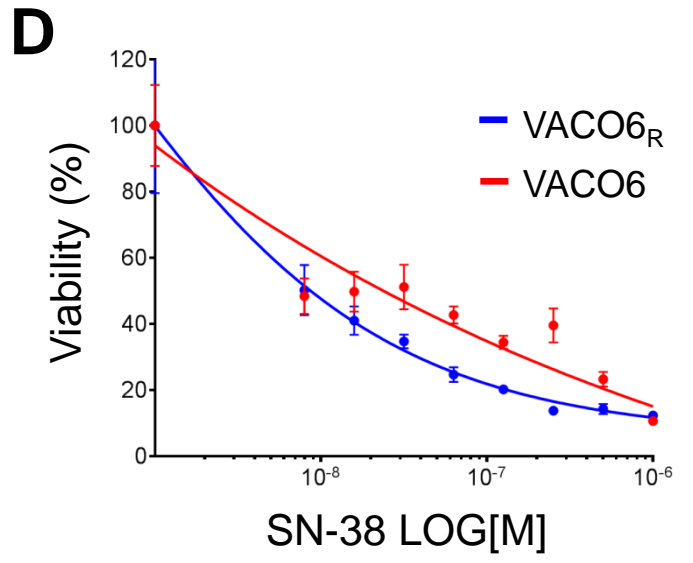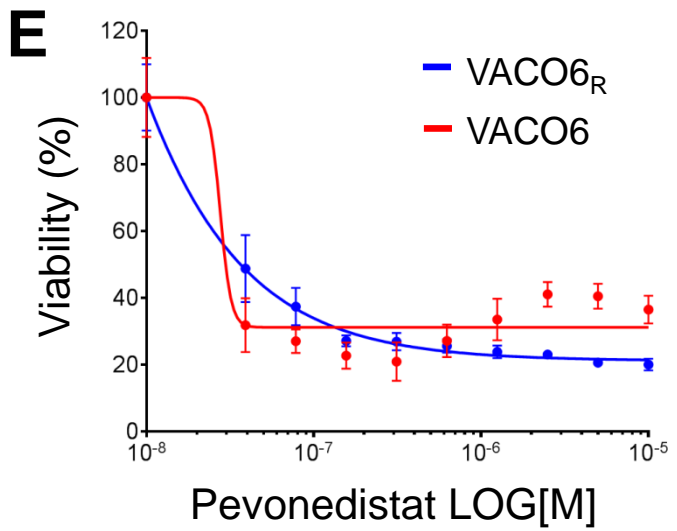

**Picco et al., Appendix Figure S7. VACO6<sub>R</sub> cells are specifically resistant to WNT pathway inhibitors.** ATP-based assay measuring viability of VACO6 and VACO6<sub>R</sub> cells after 7 days of treatment with WNT-C59 (A), XAV-939 (B), 5-FU (C), SN-38 (D) and Pevonedistat (E). Data are expressed as average ± s.d. of six technical replicates



**Picco et al. Appendix Table S1A. RSPO2/3 fusion analysis in TCGA CRC samples.** The table reports (i) the ID of CRC TCGA samples selected for the analysis (ii) the APC, KRAS and BRAF mutational status (iii) the RSPO3 mRNA levels; (iv) the CAF-signature values; (v) the level of stromal contamination, (vi) the Z-score after CAF-score correction (vii) the type of fusion transcripts identified, (viii) the tools that identified the fusion, (ix) the number of reads supporting the fusion and (x) the type of RNA-seq reads available for the analysis.

| TCGA sample ID | APC status | KRAS status | BRAF status | RSPO3 expression (Log <sub>2</sub> RSEM) | RSPO3 expression (Log <sub>2</sub> RSEM) Z-score | CAF-score (Log <sub>2</sub> ) | Delta (RSPO3 - CAF-score) | Delta (RSPO3 - CAF-score) Z-score | RSPO3 fusion          | Tools that identified the fusion | Number of supporting reads | RNA-seq reads type |
|----------------|------------|-------------|-------------|------------------------------------------|--------------------------------------------------|-------------------------------|---------------------------|-----------------------------------|-----------------------|----------------------------------|----------------------------|--------------------|
| TCGA-CA-5255   |            |             |             | 9.93                                     | 2.71                                             | 6.58                          | 3.35                      | 5.58                              | PTPRK(ex1)-RSPO3(ex2) | defuse, mapsplice                | 7                          | paired end         |
| TCGA-AF-6136   |            |             |             | 10.44                                    | 3.00                                             | 7.82                          | 2.61                      | 4.95                              | PTPRK(ex1)-RSPO3(ex2) | chimerascan, mapsplice           | 5                          | paired end         |
| TCGA-D5-6539   |            |             |             | 9.86                                     | 2.67                                             | 7.83                          | 2.03                      | 4.45                              | PTPRK(ex1)-RSPO3(ex2) | chimerascan                      | 10                         | paired end         |
| TCGA-AA-3518   | WT         | WT          | WT          | 9.12                                     | 2.25                                             | 7.43                          | 1.69                      | 4.15                              | PTPRK(ex1)-RSPO3(ex2) | mapsplice                        | 5                          | single end         |
| TCGA-AA-3842   | WT         | MUT:G13D    | WT          | 9.23                                     | 2.31                                             | 8.67                          | 0.56                      | 3.18                              | PTPRK(ex1)-RSPO3(ex2) | mapsplice                        | 3                          | single end         |
| TCGA-A6-2672   | WT         | WT          | MUT:V600E   | 9.15                                     | 2.27                                             | 8.70                          | 0.45                      | 3.08                              | not detected          |                                  |                            | paired end         |
| TCGA-DT-5265   |            |             |             | 9.87                                     | 2.67                                             | 9.54                          | 0.33                      | 2.98                              | PTPRK(ex1)-RSPO3(ex2) | defuse                           | 3                          | paired end         |
| TCGA-AZ-4323   |            |             |             | 9.27                                     | 2.34                                             | 9.56                          | -0.29                     | 2.45                              | not detected          |                                  |                            | paired end         |
| TCGA-AA-3695   | MUT:R213*  | MUT:G12D    | WT          | 10.12                                    | 2.82                                             | 10.65                         | -0.53                     | 2.24                              | not detected          |                                  |                            | single end         |
| TCGA-F5-6812   |            |             |             | 8.90                                     | 2.13                                             | 9.86                          | -0.96                     | 1.87                              | not detected          |                                  |                            | paired end         |
| TCGA-CM-6167   |            |             |             | 9.33                                     | 2.37                                             | 10.85                         | -1.52                     | 1.38                              | not detected          |                                  |                            | paired end         |
| TCGA-A6-6651   |            |             |             | 8.83                                     | 2.09                                             | 10.55                         | -1.72                     | 1.21                              | not detected          |                                  |                            | paired end         |
| TCGA-G4-6302   |            |             |             | 8.93                                     | 2.14                                             | 10.74                         | -1.81                     | 1.14                              | not detected          |                                  |                            | paired end         |
| TCGA-EI-7004   |            |             |             | 9.02                                     | 2.19                                             | 11.19                         | -2.17                     | 0.83                              | not detected          |                                  |                            | paired end         |

**Picco et al. Appendix Table S1B.** Settings for fusion transcript search in RNAseq data with Defuse, Chimerascan and Mapsplice tools.

| <i>tool</i>                        | <i>parameters</i>                                                                                                                                                                                                                                                                                                                                                                                                                                                                                                                                                                   |
|------------------------------------|-------------------------------------------------------------------------------------------------------------------------------------------------------------------------------------------------------------------------------------------------------------------------------------------------------------------------------------------------------------------------------------------------------------------------------------------------------------------------------------------------------------------------------------------------------------------------------------|
| <b>defuse (version 0.6.1)</b>      | <pre> # Bowtie parameters bowtie_threads           = 1 bowtie_qual              = --phred33-quals max_insert_size          = 500  # Blat sequences per job num_blat_sequences       = 10000  # Minimum gene fusion range dna_concordant_length    = 2000  # Trim length for discordant reads (split reads are not trimmed) discord_read_trim        = 50  # Filtering parameters clustering_precision     = 0.95 span_count_threshold     = 5 percent_identity_threshold = 0.90 split_min_anchor         = 4 splice_bias               = 10 probability_threshold     = 0.50 </pre> |
| <b>chimerascan (version 0.4.5)</b> | <pre> -p 32 --library-type fr-firststrand --multihits 50 --initial-mismatches 1 --discord-mismatches 2 --segment-length 40 --homology-mismatches 1 -- anchor-min 6 --anchor-length 12 --filter-unique-frags 4.0 </pre>                                                                                                                                                                                                                                                                                                                                                              |
| <b>mapsplice (version 2.1.8)</b>   | <pre> --fusion-non-canonical --threads 32 </pre>                                                                                                                                                                                                                                                                                                                                                                                                                                                                                                                                    |

**Appendix Table S2A. Point mutations detected by exome sequencing of VACO6<sub>R</sub> cells compared to VACO6 cells.**

| GENE ID  | Cohordinates    | Nucleotide change | Effect on translation | AA change | Position depth VACO6 | Position depth VACO6 <sub>R</sub> | % mutant reads | Occurrences in Cosmic |
|----------|-----------------|-------------------|-----------------------|-----------|----------------------|-----------------------------------|----------------|-----------------------|
| CDK18    | chr1:205498487  | c.G1198A          | nonsyn.               | p.A400T   | 164                  | 115                               | 43             | 2                     |
| PNKP     | chr19:50365045  | c.G1282T          | nonsyn.               | p.A428S   | 333                  | 296                               | 38             | 2                     |
| AP1M1    | chr19:16339599  | c.C943T           | nonsyn.               | p.R315W   | 128                  | 158                               | 37             | 2                     |
| OCM2     | chr7:97619395   | c.A22T            | nonsyn.               | p.S8C     | 101                  | 115                               | 43             | 1                     |
| MAP4K3   | chr2:39553363   | c.G586T           | nonsyn.               | p.D196Y   | 128                  | 135                               | 7              | 1                     |
| SDHA     | chr5:256455     | c.C1915G          | nonsyn.               | p.L639V   | 320                  | 281                               | 4              | 1                     |
| ZCCHC12  | chrX:117960084  | c.C877T           | nonsyn.               | p.P293S   | 113                  | 103                               | 79             | 0                     |
| NXF3     | chrX:102334704  | c.G1147A          | nonsyn.               | p.E383K   | 51                   | 53                                | 66             | 0                     |
| COL9A3   | chr20:61452558  | c.C335A           | nonsyn.               | p.P112H   | 172                  | 151                               | 55             | 0                     |
| AIF1L    | chr9:133995659  | c.C481G           | nonsyn.               | p.P161A   | 100                  | 95                                | 52             | 0                     |
| ZNF134   | chr19:58132760  | c.G1273T          | nonsyn.               | p.G425C   | 115                  | 98                                | 51             | 0                     |
| ARHGAP21 | chr10:24874647  | c.T4571C          | nonsyn.               | p.L1524P  | 137                  | 108                               | 48             | 0                     |
| DLGAP3   | chr1:35370359   | c.A626T           | nonsyn.               | p.D209V   | 111                  | 129                               | 47             | 0                     |
| EIF4G1   | chr3:184049311  | c.C4333T          | nonsyn.               | p.L1445F  | 298                  | 290                               | 46             | 0                     |
| LCA5L    | chr21:40795085  | c.G654T           | nonsyn.               | p.Q218H   | 134                  | 152                               | 45             | 0                     |
| NOL8     | chr9:95078363   | c.T544C           | nonsyn.               | p.F182L   | 75                   | 94                                | 45             | 0                     |
| SORCS3   | chr10:106401117 | c.G32A            | nonsyn.               | p.G11D    | 87                   | 77                                | 44             | 0                     |
| FLRT3    | chr20:14307220  | c.C933A           | stopgain              | p.C311*   | 165                  | 167                               | 43             | 0                     |
| SRRD     | chr22:26879962  | c.G106C           | nonsyn.               | p.G36R    | 19                   | 25                                | 40             | 0                     |
| AP1M1    | chr19:16339598  | c.G942T           | nonsyn.               | p.K314N   | 122                  | 146                               | 40             | 0                     |
| ANKRD6   | chr6:90340265   | c.C1726A          | nonsyn.               | p.Q576K   | 178                  | 186                               | 39             | 0                     |
| SCFD2    | chr4:54231369   | c.C740T           | nonsyn.               | p.A247V   | 116                  | 140                               | 39             | 0                     |
| SEMA6B   | chr19:4558147   | c.C136T           | nonsyn.               | p.P46S    | 37                   | 39                                | 38             | 0                     |
| LRRC10B  | chr11:61276987  | c.G517T           | stopgain              | p.E173*   | 151                  | 127                               | 38             | 0                     |
| FUK      | chr16:70506992  | c.C1513A          | nonsyn.               | p.L505M   | 130                  | 120                               | 38             | 0                     |
| ADH6     | chr4:100131372  | c.G434A           | nonsyn.               | p.S145N   | 215                  | 259                               | 37             | 0                     |
| CYP46A1  | chr14:100191750 | c.G1199A          | nonsyn.               | p.R400Q   | 104                  | 77                                | 36             | 0                     |
| NUTM2F   | chr9:97081325   | c.G1693T          | nonsyn.               | p.V565L   | 118                  | 111                               | 36             | 0                     |
| SEC16B   | chr1:177927999  | c.G1110T          | nonsyn.               | p.L370F   | 75                   | 93                                | 34             | 0                     |
| AKAP9    | chr7:91708592   | c.A7145T          | nonsyn.               | p.D2382V  | 240                  | 230                               | 34             | 0                     |
| TTN      | chr2:179429009  | c.G81850A         | nonsyn.               | p.V27284I | 248                  | 256                               | 34             | 0                     |
| AKAP9    | chr7:91708591   | c.G7144A          | nonsyn.               | p.D2382N  | 257                  | 247                               | 33             | 0                     |
| LPPR3    | chr19:813427    | c.G1384A          | nonsyn.               | p.A462T   | 158                  | 101                               | 32             | 0                     |
| LYPD3    | chr19:43965642  | c.C902A           | nonsyn.               | p.A301D   | 222                  | 210                               | 31             | 0                     |
| KIAA0430 | chr16:15729770  | c.C574T           | nonsyn.               | p.P192S   | 251                  | 211                               | 31             | 0                     |
| POU5F1   | chr6:31138186   | c.G212T           | nonsyn.               | p.G71V    | 205                  | 200                               | 31             | 0                     |
| KCNK15   | chr20:43379012  | c.G526A           | nonsyn.               | p.V176I   | 265                  | 192                               | 30             | 0                     |
| RASGRF1  | chr15:79291149  | c.G2813T          | nonsyn.               | p.R938M   | 207                  | 207                               | 29             | 0                     |
| RBM15B   | chr3:51430792   | c.C1962A          | nonsyn.               | p.S654R   | 131                  | 124                               | 25             | 0                     |
| AKAP3    | chr12:4737115   | c.T953C           | nonsyn.               | p.L318P   | 272                  | 269                               | 21             | 0                     |
| RBM15B   | chr3:51430809   | c.C1979T          | nonsyn.               | p.A660V   | 129                  | 111                               | 21             | 0                     |
| LMO1     | chr11:8251938   | c.G139A           | nonsyn.               | p.D47N    | 205                  | 254                               | 20             | 0                     |
| MRPL42   | chr12:93870791  | c.T132G           | nonsyn.               | p.N44K    | 117                  | 121                               | 18             | 0                     |
| SLC2A3   | chr12:8075523   | c.T1166C          | nonsyn.               | p.V389A   | 202                  | 219                               | 15             | 0                     |
| ABCA4    | chr1:94496009   | c.C4327T          | nonsyn.               | p.R1443C  | 333                  | 341                               | 14             | 0                     |
| OLFML2B  | chr1:161993133  | c.G88A            | nonsyn.               | p.E30K    | 70                   | 81                                | 12             | 0                     |
| NUTM2G   | chr9:99700853   | c.G1648T          | nonsyn.               | p.V550L   | 368                  | 342                               | 9              | 0                     |
| LRRC15   | chr3:194081462  | c.G329A           | nonsyn.               | p.R110H   | 178                  | 193                               | 9              | 0                     |
| ZFP64    | chr20:50701323  | c.G1711C          | nonsyn.               | p.V571L   | 225                  | 204                               | 9              | 0                     |
| TTN      | chr2:179658207  | c.A1460T          | nonsyn.               | p.K487M   | 124                  | 149                               | 9              | 0                     |
| FGG      | chr4:155529781  | c.T688A           | nonsyn.               | p.F230I   | 141                  | 145                               | 8              | 0                     |
| CACNA1C  | chr12:2711030   | c.A2924G          | nonsyn.               | p.Y975C   | 331                  | 321                               | 8              | 0                     |
| KRT81    | chr12:52681013  | c.G1120A          | nonsyn.               | p.A374T   | 584                  | 512                               | 8              | 0                     |
| SMG7     | chr1:183495830  | c.G412A           | nonsyn.               | p.A138T   | 131                  | 143                               | 8              | 0                     |
| CACNA1C  | chr12:2774080   | c.C4466A          | nonsyn.               | p.T1489K  | 339                  | 323                               | 7              | 0                     |
| GCNT2    | chr6:10529656   | c.T512C           | nonsyn.               | p.L171P   | 189                  | 177                               | 7              | 0                     |
| TRIM26   | chr6:30154018   | c.T1255G          | nonsyn.               | p.L419V   | 117                  | 155                               | 7              | 0                     |
| WDR35    | chr2:20131104   | c.G2923A          | nonsyn.               | p.A975T   | 178                  | 171                               | 7              | 0                     |
| KIRREL   | chr1:158064767  | c.G2131T          | nonsyn.               | p.A711S   | 131                  | 181                               | 7              | 0                     |
| ATF7     | chr12:53937094  | c.C284T           | nonsyn.               | p.A95V    | 273                  | 269                               | 6              | 0                     |
| ZNF726   | chr19:24116410  | c.G1492A          | nonsyn.               | p.A498T   | 186                  | 203                               | 6              | 0                     |
| PCDHB13  | chr5:140595593  | c.G1898A          | nonsyn.               | p.R633H   | 292                  | 242                               | 6              | 0                     |
| MCAT     | chr22:43529240  | c.C982T           | stopgain              | p.Q328*   | 269                  | 246                               | 5              | 0                     |
| MUC17    | chr7:100678112  | c.A3415C          | nonsyn.               | p.S1139R  | 368                  | 355                               | 5              | 0                     |
| IGFN1    | chr1:201178696  | c.G4675C          | nonsyn.               | p.G1559R  | 218                  | 179                               | 5              | 0                     |
| TF       | chr3:133467417  | c.A205G           | nonsyn.               | p.R69G    | 228                  | 196                               | 5              | 0                     |
| MUC17    | chr7:100678130  | c.G3433T          | nonsyn.               | p.A1145S  | 399                  | 364                               | 4              | 0                     |
| NOMO1    | chr16:14969038  | c.A2200C          | nonsyn.               | p.T734P   | 439                  | 429                               | 2              | 0                     |

Appendix Table S2B. Insertions / deletions detected by exome sequencing of VACO6<sub>R</sub> cells compared to VACO6 cells.

| GENE ID      | Cordinates                | Insert / Del | Indel size | Effect     | Position depth VACO6 | Position depth VACO6 <sub>R</sub> | % altered reads | Occurrences in COSMIC |
|--------------|---------------------------|--------------|------------|------------|----------------------|-----------------------------------|-----------------|-----------------------|
| AXIN1        | chr16:396233-396235       | Del          | D-1        | frameshift | 248                  | 127                               | 26              | 1                     |
| AXIN1        | chr16:338207-338209       | Del          | D-1        | frameshift | 438                  | 357                               | 25              | 1                     |
| PCDH12       | chr5:141324955-141324956  | Insert       | I-9        | in-frame   | 101                  | 60                                | 57              | 17                    |
| ATXN2L       | chr16:28847349-28847351   | Del          | D-1        | frameshift | 20                   | 17                                | 65              | 8                     |
| BRD7         | chr16:50368677-50368680   | Del          | D-2        | frameshift | 121                  | 148                               | 11              | 7                     |
| EP400        | chr12:132547093-132547094 | Insert       | I-9        | in-frame   | 355                  | 97                                | 33              | 6                     |
| EP400        | chr12:132547093-132547094 | Insert       | I-6        | in-frame   | 355                  | 91                                | 29              | 6                     |
| OR2T2        | chr1:248616704-248616712  | Del          | D-7        | frameshift | 428                  | 370                               | 5               | 5                     |
| KCNN3        | chr1:154842199-154842200  | Insert       | I-9        | in-frame   | 221                  | 28                                | 61              | 4                     |
| KCNN3        | chr1:154842199-154842200  | Insert       | I-6        | in-frame   | 221                  | 24                                | 54              | 4                     |
| NOS1         | chr12:117703229-117703230 | Insert       | I-1        | frameshift | 124                  | 116                               | 13              | 4                     |
| OR8D4        | chr11:123777441-123777443 | Del          | D-1        | frameshift | 182                  | 117                               | 9               | 4                     |
| IFRD1        | chr7:112108038-112108040  | Del          | D-1        | frameshift | 314                  | 297                               | 28              | 3                     |
| NUMA1        | chr11:71746964-71746966   | Del          | D-1        | frameshift | 139                  | 119                               | 8               | 3                     |
| GCN1         | chr12:120595736-120595740 | Del          | D-3        | in-frame   | 231                  | 198                               | 5               | 3                     |
| WRN          | chr8:30945376-30945380    | Del          | D-3        | in-frame   | 304                  | 283                               | 4               | 3                     |
| TMEM229A     | chr7:123672456-123672460  | Del          | D-3        | in-frame   | 117                  | 88                                | 65              | 2                     |
| KCNN3        | chr1:154842199-154842200  | Insert       | I-9        | in-frame   | 221                  | 28                                | 61              | 2                     |
| KCNN3        | chr1:154842199-154842200  | Insert       | I-6        | in-frame   | 221                  | 24                                | 54              | 2                     |
| HPS1         | chr10:100186986-100186987 | Insert       | I-1        | frameshift | 159                  | 164                               | 30              | 2                     |
| KCNN3        | chr1:154842199-154842200  | Insert       | I-9        | in-frame   | 221                  | 28                                | 61              | 1                     |
| KCNN3        | chr1:154842199-154842200  | Insert       | I-6        | in-frame   | 221                  | 24                                | 54              | 1                     |
| CLDN6        | chr16:3065485-3065487     | Del          | D-1        | frameshift | 76                   | 42                                | 38              | 1                     |
| MMP10        | chr11:102650394-102650395 | Insert       | I-1        | frameshift | 208                  | 183                               | 34              | 1                     |
| EP400        | chr12:132547093-132547094 | Insert       | I-9        | in-frame   | 355                  | 97                                | 33              | 1                     |
| EP400        | chr12:132547093-132547094 | Insert       | I-6        | in-frame   | 355                  | 91                                | 29              | 1                     |
| PRRC2A       | chr6:31602640-31602642    | Del          | D-1        | frameshift | 301                  | 244                               | 24              | 1                     |
| ZNF717       | chr3:75786894-75786896    | Del          | D-1        | frameshift | 879                  | 118                               | 24              | 1                     |
| ZNF717       | chr3:75786555-75786556    | Insert       | I-2        | frameshift | 737                  | 107                               | 19              | 1                     |
| UNC93B1      | chr11:67771217-67771221   | Del          | D-3        | in-frame   | 231                  | 152                               | 7               | 1                     |
| BHLHE22      | chr8:65494020-65494024    | Del          | D-3        | in-frame   | 221                  | 179                               | 6               | 1                     |
| RPL14        | chr3:40503520-40503521    | Insert       | I-3        | in-frame   | 143                  | 43                                | 74              | --                    |
| RPL14        | chr3:40503520-40503521    | Insert       | I-6        | in-frame   | 143                  | 39                                | 72              | --                    |
| ATG3         | chr3:112253058-112253059  | Insert       | I-1        | frameshift | 82                   | 30                                | 53              | --                    |
| TRIL         | chr7:28997596-28997597    | Insert       | I-1        | frameshift | 143                  | 99                                | 46              | --                    |
| RAPGEF6      | chr5:130764796-130764801  | Del          | D-4        | frameshift | 157                  | 149                               | 46              | --                    |
| EOMES        | chr3:27763427-27763428    | Insert       | I-6        | in-frame   | 79                   | 43                                | 37              | --                    |
| WI2-2373I1.2 | chr7:331127-331131        | Del          | D-3        | in-frame   | 33                   | 41                                | 37              | --                    |
| ARV1         | chr1:231131566-231131569  | Del          | D-2        | frameshift | 151                  | 144                               | 35              | --                    |
| KIR2DL4      | chr19:55324674-55324675   | Insert       | I-1        | frameshift | 253                  | 157                               | 35              | --                    |
| BCAR1        | chr16:75269741-75269743   | Del          | D-1        | frameshift | 65                   | 54                                | 33              | --                    |
| MAML3        | chr4:140811063-140811079  | Del          | D-15       | in-frame   | 190                  | 55                                | 33              | --                    |
| CWC22        | chr2:180810054-180810057  | Del          | D-2        | frameshift | 122                  | 105                               | 30              | --                    |
| SEC14L2      | chr22:30805433-30805435   | Del          | D-1        | frameshift | 178                  | 144                               | 28              | --                    |
| ARID1B       | chr6:157099426-157099427  | Insert       | I-6        | in-frame   | 125                  | 105                               | 28              | --                    |
| NRP2         | chr2:206562375-206562377  | Del          | D-1        | frameshift | 263                  | 211                               | 27              | --                    |
| GALNT5       | chr2:158167772-158167774  | Del          | D-1        | frameshift | 80                   | 87                                | 24              | --                    |
| CCDC159      | chr19:11461508-11461510   | Del          | D-1        | frameshift | 103                  | 105                               | 20              | --                    |
| ZNF880       | chr19:52887149-52887247   | Del          | D-97       | frameshift | 110                  | 54                                | 19              | --                    |
| HLA-A        | chr6:29912028-29912031    | Del          | D-2        | frameshift | 340                  | 190                               | 16              | --                    |
| PMS1         | chr2:190670378-190670380  | Del          | D-1        | frameshift | 219                  | 182                               | 12              | --                    |
| ANKRD36C     | chr2:96592972-96593062    | Del          | D-89       | frameshift | 285                  | 161                               | 11              | --                    |
| MUC5B        | chr11:1267447-1271222     | Del          | D-3774     | in-frame   | 353                  | 132                               | 11              | --                    |
| PRKRA        | chr2:179301046-179307993  | Del          | D-6946     | frameshift | 16                   | 175                               | 9               | --                    |
| SLC10A5      | chr8:82606649-82606650    | Insert       | I-1        | frameshift | 128                  | 138                               | 8               | --                    |
| MAPKBP1      | chr15:42092079-42092081   | Del          | D-1        | frameshift | 130                  | 126                               | 8               | --                    |
| MUC5B        | chr11:1267611-1271470     | Del          | D-3858     | in-frame   | 346                  | 213                               | 8               | --                    |
| TLR4         | chr9:120476083-120476084  | Insert       | I-1        | frameshift | 209                  | 185                               | 7               | --                    |
| MUC5B        | chr11:1267306-1271078     | Del          | D-3771     | in-frame   | 352                  | 187                               | 6               | --                    |
| POTED        | chr21:14982606-14982607   | Insert       | I-111      | in-frame   | 336                  | 197                               | 6               | --                    |
| MUC12        | chr7:100637861-100642533  | Del          | D-4671     | in-frame   | 891                  | 338                               | 5               | --                    |
| AXIN1        | chr16:354362-354364       | Del          | D-1        | frameshift | 335                  | 285                               | 4               | --                    |
| HRNR         | chr1:152188231-152191052  | Del          | D-2820     | in-frame   | 1279                 | 1261                              | 2               | --                    |
| MUC12        | chr7:100642276-100645526  | Del          | D-3249     | in-frame   | 1106                 | 848                               | 2               | --                    |
| MUC12        | chr7:100643201-100646451  | Del          | D-3249     | in-frame   | 1092                 | 818                               | 2               | --                    |
| MUC12        | chr7:100642062-100645312  | Del          | D-3249     | in-frame   | 1198                 | 1364                              | 2               | --                    |
