# Supplementary material for: Loss of AXIN1 drives acquired resistance to WNT pathway blockade in colorectal cancer cells carrying RSPO3 fusions
Source: PubMed Central journal article supplement (PMC5331210; doi:10.15252/emmm.201606773), 2017-01-18
Supplement: EMMM-9-293-s003.pdf [file EMMM-9-293-s003.pdf]

**Figure 3**

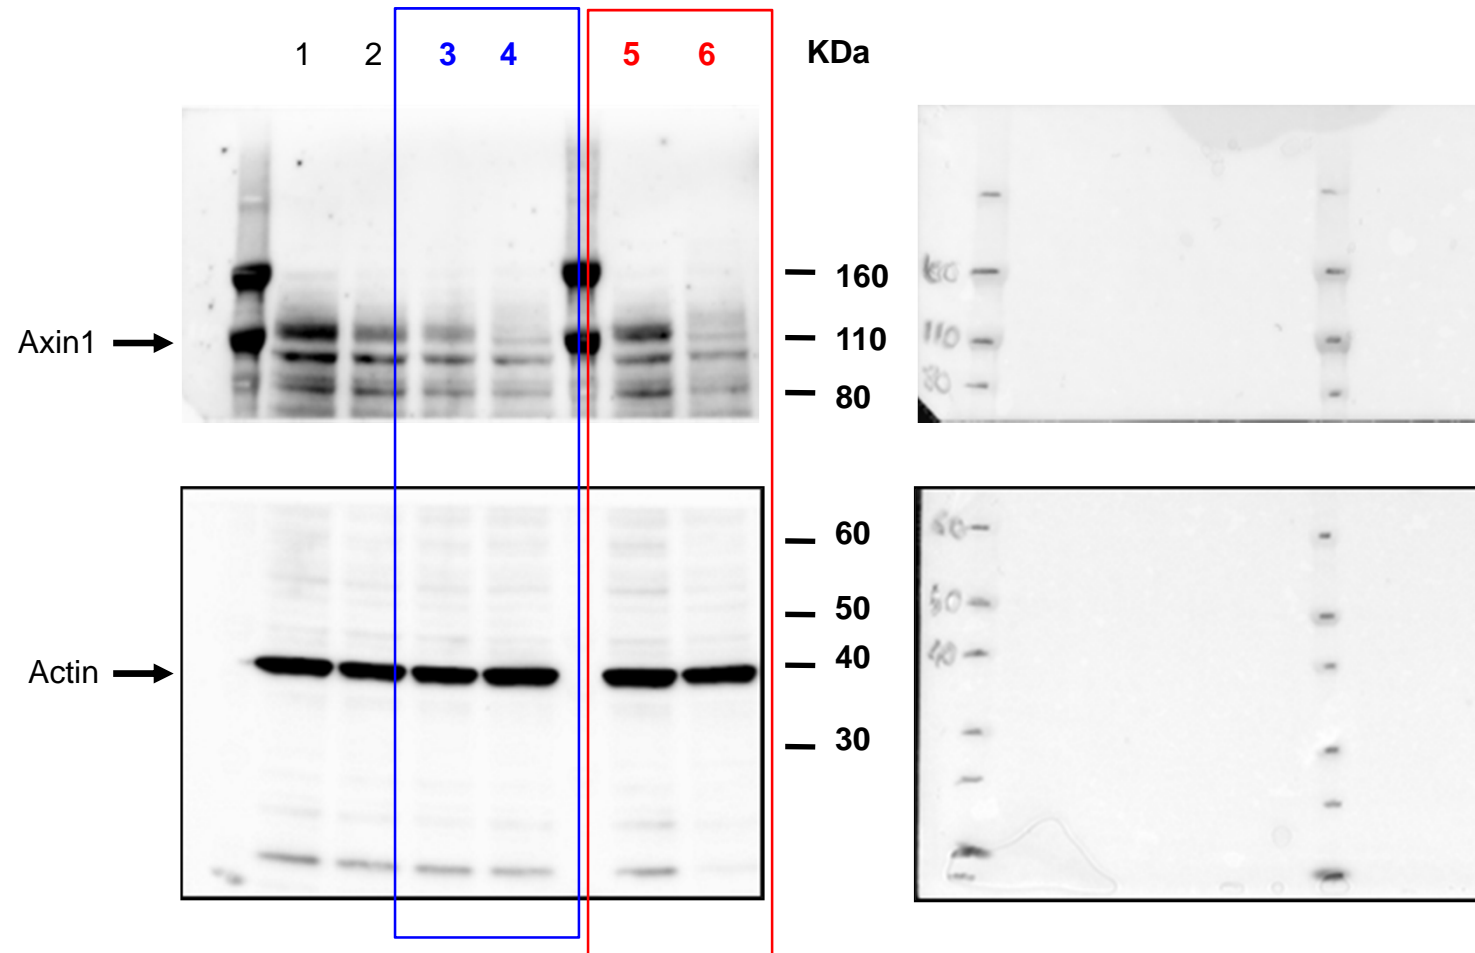

**Samples:**

1 VACO6 WT

2 VACO6 Mock

3 VACO6 CTRL- (non-silencing)

4 VACO6 siRNA Axin1

5 VACO6 WT

6 VACO6<sub>R</sub>

→ Figure 3E

→ Figure 3C
